# Supplementary material for: Analysis of the Outer Membrane Proteome and Secretome of Bacteroides fragilis Reveals a Multiplicity of Secretion Mechanisms
Source: PLoS One. 2015 Feb 6;10(2):e0117732. doi: 10.1371/journal.pone.0117732 (PMC4319957; doi:10.1371/journal.pone.0117732)
Supplement: S1 Table — (XLSX) [file pone.0117732.s002.xlsx]

## Sheet: Sheet1
Table S1. Proteins in OM fractions with ≥ 4 unique peptides identified by LC/MS/MS
Locus_tag	Length	PK sensitive?2	Fold difference	PK sensitive in membranes/	Number unique peptides	PEP value	Type5	Conserved domains	Putative function	Mean6	ln mean	SD ln ratio	SD ln mean	Mean-SD	Mean+SD
	(aa)1		-PK/+PK3	PK sensitive on cell surface?4
BF9343_2980	524	Yes	16	Yes/No*	10	0	b-barrel	None	Unknown (Predicted b-barrel)	6.60826	1.88832	1.69759	0.565864	1.21013	36.0862
BF9343_3929	192	Yes	17	NF	7	1.65e-58	b-barrel	OMP_b-brl	Putative porin (Predicted b-barrel)	113.294	4.72999	2.08495	0.694985	14.0839	911.363
BF9343_2862	736	Yes	X	NF	6	3.25e-49	b-barrel	Pat_PNPLA6_PNPLA7_NTE1_like, Bac_surface_Ag, RssA	Patatin-like protein (Predicted b-barrel)
BF9343_2071	244	Yes	X	NF	5	5.22e-22	b-barrel	OMP_b-brl_2	Putative porin (Predicted b-barrel)
BF9343_3295	235	Yes	X	Yes/No*	4	2.47e-15	b-barrel	None	Unknown (Predicted b-barrel)
BF9343_3470	261	Yes	X	Yes/No*	4	1.99e-48	b-barrel	OMP_b-brl_2	Putative porin (Predicted b-barrel)
BF9343_1221	378	No	NA	Yes/No	33	0	b-barrel	OmpA_C-like, OMP_b-brl, HALZ, OmpA	Porin
BF9343_1322	501	No	NA	Yes/Yes*	32	0	b-barrel	None	Unknown, predicted b-barrel
BF9343_3708	395	No	NA	Yes/No	27	0	b-barrel	OmpA_C-like, OmpA	OmpA
BF9343_0431	842	No	NA	Yes/No	23	1.55e-192	b-barrel	Bac_surface_Ag, Surf_Ag_VNR, OM_YaeT	BamA
BF9343_1608	372	No	NA	Yes/No	21	0	b-barrel	OmpA_C-like, OMP_b-brl, OmpA	Porin
BF9343_0947	424	No	NA	Yes/No	17	3.43e-192	b-barrel	None	Unknown (Predicted b-barrel)
BF9343_1876	224	No	NA	Yes/No	16	0	b-barrel	OmpA_C-like, OmpA	OmpA-like
BF9343_2485	189	No	NA	Yes/No	15	3.78e-228	b-barrel	OMP_b-brl_2	Porin
BF9343_1571	684	No	NA	Yes/No	13	2.18e-104	b-barrel	DUF4289	Unknown (Predicted b-barrel)
BF9343_2541	477	No	NA	Yes/No	13	9.44e-96	b-barrel	DUF3078	Unknown (Predicted b-barrel)
BF9343_1563	556	No	NA	Yes/No	11	7.12e-217	b-barrel	OM_channels super family	Porin
BF9343_3934	395	No	NA	NF	9	5.29e-151	b-barrel	Porin_O_P	Porin
BF9343_1324	429	No	NA	No/No	9	2.39e-132	b-barrel	None	Unknown (Predicted b-barrel)
BF9343_2484	170	No	NA	Yes/No	8	4.29e-108	b-barrel	OMP_b-brl	Porin
BF9343_3509	912	No	NA	NF	8	2.31e-180	b-barrel	Imp	OstA homologue (Predicted b-barrel)
BF9343_1565	297	No	NA	NF	8	1.94e-169	b-barrel	None	Unknown (Predicted b-barrel)
BF9343_0497	208	No	NA	NF	7	6.21e-50	b-barrel	OMP_b-brl	Porin
BF9343_0150	406	No	NA	Yes/No	6	5.45e-96	b-barrel	None	Unknown (Predicted b-barrel)
BF9343_0315	439	No	NA	NF	6	1.13e-42	b-barrel	Porin_O_P super family	Phosphate-selective porin O and P
BF9343_3454	194	No	NA	NF	5	3.8e-95	b-barrel	OMP_b-brl_2	Porin
BF9343_2555	235	No	NA	NF	4	2.91e-17	b-barrel	OMP_b-brl_2	Porin
BF9343_3112	226	No	NA	NF	4	1.31e-45	b-barrel	None	Unknown (Predicted b-barrel)
BF9343_2571	418	Yes	X	NF	4	6.87e-35	b-barrel	OEP	TolC-like
BF9343_4200	430	Yes	X	NF	4	1.6e-29	b-barrel	OEP	TolC-like
BF9343_3859	439	No	NA	NF	10	1.4e-177	b-barrel	type_I_sec_TolC	TolC-like
BF9343_3420	392	No	NA	Yes/No	9	5.37e-245	b-barrel	OEP	TolC-like
BF9343_2447	487	No	NA	Yes/No	7	2.27e-75	b-barrel	TolC	TolC-like (presence of SP is not clear)
BF9343_3066	424	No	NA	NF	6	2.1e-127	b-barrel	type_I_sec_TolC	TolC-like
BF9343_2394	468	No	NA	NF	4	2.33e-91	b-barrel	TolC	TolC-like
BF9343_0483	443	NF	NA	No/No	5	2.96e-21	b-barrel	type_I_sec_TolC	TolC-like
BF9343_4225	647	No	NA	NA	34	0	Cytoplasmic	Succ_DH_flav_C, ADB_Rossmann super family, sdhA	SdhA
BF9343_1942	149	No	NA	NA	19	7.31e-273	Cytoplasmic	None	TssB
BF9343_1986	423	No	NA	NA	19	1.48e-201	Cytoplasmic	NADH_quinone_reductase, fer2, PRK05464	Na(+)-translocating NADH-quinone reductase, F
BF9343_1981	450	No	NA	NA	17	5.34e-147	Cytoplasmic	QRA_SLBB, PRK05352	Na(+)-translocating NADH-quinone reductase, A
BF9343_4226	251	No	NA	NA	16	2.13e-182	Cytoplasmic	Fer2_3, PRK07570	Succinate dehydrogenase/fumarate reductase
BF9343_2537	445	No	NA	NA	15	1.68e-140	Cytoplasmic	RnfC_N, SLBB, ACS_1, rnfC	RnfC
BF9343_3900	705	No	NA	NA	14	1.96e-242	Cytoplasmic	EF-G, EFG_mtEFG1_IV, EFG_mtEFG_C, EFG_mtEFG_II, PRK12739	Elongation factor G
BF9343_2231	422	Yes	NA	NF	11	2.85e-145	Cytoplasmic	None	Unknown
BF9343_3684	278	No	NA	NA	10	3.86e-124	Cytoplasmic	RPS2	RpsB (Ribosomal protein S2)
BF9343_3909	1427	No	NA	NA	10	0	Cytoplasmic	RNAP_beta'_C, RPOLA_N, RNA_pol_Rpb1_1,_3,_4, RpoC	RpoC
BF9343_2107	869	No	NA	NA	9	1.29e-182	Cytoplasmic	ZnMc_MMP_like_2	Zinc-dependent metalloprotease
BF9343_3706	1073	No	NA	NA	9	4.36e-243	Cytoplasmic	MGS_CPS_I_III, CPSase_L_D3, CPSase_L_chain, ATP-grasp_4	Carbamoyl-phosphate synthase, large subunit
BF9343_3787	491	No	NA	NA	9	4.99e-80	Cytoplasmic	IMPDH, CBS_pair_IMPDH, PRK05567	Inosine 5'-monophosphate dehydrogenase
BF9343_3898	205	No	NA	NA	9	1.6e-126	Cytoplasmic	rplC	RplC (50s ribosomal protein L3)
BF9343_2797	159	No	NA	NA	9	1.22e-124	Cytoplasmic	Nonheme_Ferritin, Ferritin	Ferritin
BF9343_3315	511	No	NA	NF	8	2.56e-169	Cytoplasmic	HDIG, PRK12704	Phosphodiesterase
BF9343_0847	333	No	NA	NA	7	5.06e-148	Cytoplasmic	Gp_dh_N, Gp_dh_C, GAPDH-I	Glyceraldehyde-3-phosphate dehydrogenase, type I
BF9343_0919	597	No	NA	NA	7	3.24e-114	Cytoplasmic	S1_RPS1_repeat_ec1, _ec2, _ec3, S1, rpsA	30S ribosomal protein S1
BF9343_2970	439	No	NA	NA	7	3.45e-138	Cytoplasmic	SRP, SRP_SPB, SRP54_N, PRK10867	Signal recognition particle
BF9343_3210	1000	No	NA	NF	7	1.86e-68	Cytoplasmic	RT_Bac_retron_I, ALP_N-acyl_transferase	Unknown
BF9343_3872	201	No	NA	NA	6	2.45e-35	Cytoplasmic	S4, Ribosomal_S4, rpsD	30S ribosomal protein S4
BF9343_1130	639	No	NA	NF	6	1.94e-172	Cytoplasmic	HSPA9-Ssq1-like_NBD, dnaK	DnaK
BF9343_3042	517	No	NA	NA	6	4.27e-211	Cytoplasmic	ACCA super family, mmdA	MmdA
BF9343_3429	424	No	NA	NA	6	1.98e-102	Cytoplasmic	PLDc_CLS_2, PLDc_CLS_1, PLDc_2	Phospholipid biosythesis-like
BF9343_2624	1439	No	NA	NA	6	1.12e-58	Cytoplasmic	CobN_like, CobN-Mg_chel	CobN-like
BF9343_0027	457	No	NA	NF	5	3.29e-78	Cytoplasmic	Radical_SAM, UPF0004, TRAM, PRK14329	(Dimethylallyl)adenosine tRNA methylthiotransferase
BF9343_3686	153	No	NA	NA	5	3.73e-91	Cytoplasmic	Ribosomal_L13	RplM (Ribosomal protein L13)
BF9343_3871	330	No	NA	NA	5	4.9e-83	Cytoplasmic	RNAP_alpha_NTD, RNA_pol_A_CTD, PRK05182	RpoA (DNA-directed RNA polymerase subunit alpha)
BF9343_3873	129	Yes	NA	NF	5	1.57e-09	Cytoplasmic	PRK05309	30S ribosomal protein S11
BF9343_3892	244	No	NA	NA	5	3.73e-89	Cytoplasmic	30S_S3_KH, Ribosomal_S3_C, rpsC	RpsC (30S ribosomal protein S3)
BF9343_3899	101	No	NA	NF	5	4.61e-45	Cytoplasmic	rpsJ	30S ribosomal protein S10
BF9343_1096	429	No	NA	NA	5	2.54e-78	Cytoplasmic	enolase, eno	Enolase
BF9343_4134	535	No	NA	NA	5	6.9e-77	Cytoplasmic	PEPCK_ATP	Phosphoenolpyruvate carboxykinase
BF9343_3052	334	No	NA	NA	5	1.88e-83	Cytoplasmic	TBP_aldolase_IIB, PRK09197	Fructose-bisphosphate aldolase
BF9343_3162	154	No	NA	NA	5	6.35e-67	Cytoplasmic	HTH_AraC super family, HTH_18	AraC family transcriptional regulator
BF9343_3393	797	No	NA	NF	5	2.73e-185	Cytoplasmic	RNR_III, ATP-cone, PRK07111	Anaerobic ribonucleoside triphosphate reductase
BF9343_3409	343	No	NA	NF	5	1.52e-28	Cytoplasmic	MPP_YkuE_C, Metallophos	Phosphoesterase
pBF9343.39c	369	No	NA	NA	5	8.7841e-19	Cytoplasmic	DUF3714, Bac_Flav_CT_M	TraM
BF9343_3910	1270	No	NA	NA	5	6.71e-139	Cytoplasmic	RNA_pol_B_RPB2, RNA_pol_Rpb2_6, RNA_pol_B_RPB2, rpoB	RpoB
BF9343_0215	420	No	NA	NF	4	8.39e-35	Cytoplasmic	NusA_KH, S1_NusA, NusA_N, KH_5, NusA	Transcription termination factor NusA
BF9343_0216	1015	No	NA	NA	4	9.68e-86	Cytoplasmic	IF2_eIF5B, IF2_mtIF2_II, mtIF2_Ivc, IF-2, IF2_N	Translation initiation factor IF-2
BF9343_0250	388	Yes	NA	NF	4	1.05e-11	Cytoplasmic	GT1_MurG, murG	MurG
BF9343_0891	105	No	NA	NA	4	5.07e-24	Cytoplasmic	rplU, PRK12278	50S ribosomal protein L21
BF9343_3628	251	Yes	NA	NF	4	8.51e-124	Cytoplasmic	TIM, PRK14567	Triosephosphate isomerase
BF9343_3690	466	No	NA	NF	4	1.08e-106	Cytoplasmic	PseudoU_synth_RsuA_like, S4, RsuA	16S rRNA uridine-516 pseudouridylate synthase
BF9343_2305	418	No	NA	NF	4	7.13e-78	Cytoplasmic	DEADc, HELICc, PTZ00424	ATP dependent RNA helicase
BF9343_3791	451	No	NA	NA	4	2.64e-113	Cytoplasmic	tig	Trigger factor
BF9343_3804	317	No	NA	NF	4	4.02e-42	Cytoplasmic	MTHFR	Methylenetetrahydrofolate reductase
BF9343_3812	340	No	NA	NA	4	1.96e-40	Cytoplasmic	MreB_like, PRK13927	Rod shape-determining protein MreB
BF9343_3885	99	No	NA	NF	4	1.41e-26	Cytoplasmic	rpsN	30S ribosomal protein S14
BF9343_3886	185	No	NA	NA	4	1.31e-50	Cytoplasmic	Ribosomal_L5_C, Ribosomal_L5, rplE	50S ribosomal protein L5
BF9343_1105	196	Yes	NA	NA	4	1.73e-63	Cytoplasmic	Ribosomal_L25_TL5_CTC, PRK05618	50S ribosomal protein L25
BF9343_2664	196	No	NA	NF	4	3.36e-32	Cytoplasmic	ATP-synt_B super family, NtpE	Archaeal/vacuolar-type H+-ATPase subunit E
BF9343_2966	688	No	NA	NF	4	3.99e-70	Cytoplasmic	rho_factor, Rho_CSD, Rho_N, PRK12608	Transcription termination factor Rho
BF9343_2977	295	No	NA	NA	4	6.32e-56	Cytoplasmic	ABC_DR_subfamily_A, CcmA	ABC-type multidrug transport system, ATPase
BF9343_3136	545	No	NA	NA	4	3.42e-172	Cytoplasmic	GroEL, groEL	GroEL
BF9343_3870	161	No	NA	NF	4	6.41e-78	Cytoplasmic	rplQ	50S ribosomal protein L17
BF9343_2486	906	No	NA	NF	4	4.11e-109	Cytoplasmic	PEP-utilizers_C, PPDK_N (2), PEP-utilizers, PRK09279	Pyruvate phosphate dikinase
BF9343_3018	339	No	NA	NF	4	1.7e-72	Cytoplasmic	PheRS_alpha_core, Phe_tRNA-synt_N, pheS	Phenylalanyl-tRNA synthetase subunit alpha
BF9343_2739	324	No	NA	NA	4	6.51e-44	Cytoplasmic	DHOD_like, PRK07565	Dihydroorotate dehydrogenase
BF9343_0071	430	NF	NA	NF	4	8.56e-38	Cytoplasmic	S-AdoMet_synt_N, S-AdoMet_synt_M, PRK05250	MetK (S-adenosylmethionine synthetase)
BF9343_0977	425	NF	NA	NF	4	1.46e-08	Cytoplasmic	UDPG_MGDP_dh, NADB_Rossmann superfamily, PRK15182	UDP-glucose-6 dehydrogenase
BF9343_1259	742	NF	NA	NF	4	1.23e-91	Cytoplasmic	PFL1, pyr_form_ly_1	Formate acetyltransferase 1
BF9343_3502	575	NF	NA	NF	4	3.98e-41	Cytoplasmic	LysRS_core, LysRS_N, DUF4332 superfamily, lysS	LysS (lysyl-tRNA synthetase)
BF9343_3917	394	NF	NA	NA	5	5.31e-145	Cytoplasmic	EF_Tu, EFTU_III, EFTU_II, PRK12735	Elongation factor Tu
BF9343_4148	599	NF	NA	NA	4	9.62e-94	Cytoplasmic	TypA_BipA, BipA_TypA_II, BipA_TypA_C	GTP-binding protein TypA/BipA
BF9343_1983	225	Yes	X	NF	9	1.83e-162	Enzyme (+SP)	PRK05346, nqrC	NADH:ubiquinone oxidoreductase, C subunit
BF9343_0774	415	Yes	X	NF	5	5.37e-19	Enzyme (+SP)	N-glycanase_C, N-glycanase_N	Putative N-glycanase
BF9343_2675	515	Yes	X	Yes/No*	4	3.93e-53	Enzyme (+SP)	PDZ_serine_protease, Trypsin_2, degP_htrA_DO	Putative heat shock related serine protease
BF9343_0861	736	No	NA	NF	13	4.32e-193	Enzyme (+SP)	Peptidase_S9, DPPIV_N	Dipeptiyl-peptidase
BF9343_2869	969	No	NA	Yes/No	13	2.17e-271	Enzyme (+SP)	CBM6_mannanase-like, FN3, MurNAc-LAA superfamily	Xanthan lyase
BF9343_0079	1090	No	NA	NF	10	1.58e-202	Enzyme (+SP)	Peptidase_S41_TRI, PDZ_CTP_protease, PD40, Prc, COG4946	Peptidase
BF9343_2436	1077	No	NA	Yes/No	8	0.00043993	Enzyme (+SP)	Peptidase_S41_TRI, PDZ_CTP_protease, PD40, WD40 ,COG4946	Protease
BF9343_0491	290	No	NA	No/No	7	1.38e-32	Enzyme (+SP)	MPP_UshA_N_like, Metallophos	5'-nucleotidase
BF9343_3652	1095	No	NA	No/No	4	2.22e-77	Enzyme (+SP)	Peptidase_S41_TRI, PDZ_CTP_protease, PD40, Prc, TolB	Peptidase
BF9343_4117	1007	No	NA	NF	26	7.15e-304	IM	SecD_SecF, 2A0604s01, secD, secF	Bifunctional prepotein translocase subunit SecD/SecF
BF9343_0086	1119	No	NA	NF	12	1.32e-165	IM	DUF2723	Unknown
BF9343_3820	1514	No	NA	NF	9	5.2e-32	IM	DUF490	Unknown
BF9343_0145	494	No	NA	NF	9	8.26e-84	IM	S26_SPase_I, LepB	Signal peptidase I
BF9343_0943	1109	No	NA	NA	7	1.56e-143	IM	HELICc, SecA_PP_bind, SEC-C, secA	SecA (Preprotein translocase subunit)
BF9343_2761	634	No	NA	NA	6	9.34e-66	IM	UDP_invert_4-6DH_SDR_e, COG1086	Predicted nucleoside-diphosphate sugar epimerase
BF9343_2462	1312	Yes	NA	NF	6	8.09e-41	IM	CobN_like (2), CobN-Mg_chel	CobN/Magnesium Chelatase
BF9343_0374	711	Yes	NA	NF	5	2.92e-30	IM	Na_H_Antiporter_C, KefB, Na_H_Exchanger	Na+/H+ antiporter
BF9343_0862	242	Yes	NA	NF	4	1.13e-43	IM	DUF2154	Unknown
BF9343_0869	837	Yes	NA	NF	4	8.75e-12	IM	AsmA_2, DUF490 superfamily	Unknown
BF9343_2544	618	Yes	NA	NA	4	1.21e-93	IM	60KD_IMP superfamily, PRK01318	YidC
BF9343_4044	565	No	NA	NA	4	1.83e-41	IM	Na_Pi_cotrans (2), PhoU, NptA	Na+/phosphate symporter
BF9343_1108	108	Yes	NA	NA	4	1.8e-177	IM	YajC	YajC
BF9343_3045	386	No	NA	NF	4	2.23e-57	IM	OAD_beta superfamily	Na+-transporting oxaloacetate decarboxylase
BF9343_0186	611	Yes	NA	NF	4	1.04e-67	IM	ABCC_MsbA, ABC_membrane, MdlB	ABC transproter ATP-biniding protein
BF9343_2448	332	No	NA	NF	5	5.16e-63	IM	HlyD_3, Biotin_lipoyl_2, heterocyst_DevB	Unknown, possible role in efflux
BF9343_3516	297	No	NA	NF	5	4.19e-113	IM	MCE, Mtu_fam_mce	Unknown
BF9343_0484	366	Yes	NA	NA	4	3.09e-20	IM	HlyD_3, Biotin_lipoyl_2, RND_mfp	Unknown, possible role in efflux
BF9343_2535	222	No	NA	NF	4	6.92e-70	IM	FMN_bind superfamily	Electron transport complex protein RnfG
BF9343_4154	832	No	NA	NF	4	1.71e-14	IM	YfhO (2)	YfhO domain protein
BF9343_0187	410	Yes	NA	NF	4	5.22e-16	IM	None	Unknown
BF9343_0838	227	Yes	NA	NA	4	1.44e-42	IM	TPR_12	Unknown
BF9343_1311	621	Yes	NA	NF	4	8.58e-44	IM	SLC13_permease, TrkA_C, CitT	Putative sodium/sulfate transporter
BF9343_4121	327	NF	NA	NF	6	4.32e-21	IM	Mfa2	Unknown
BF9343_1870	186	Yes	NA	NF	4	1.74e-83	IM	LemA	Unknown (LemA-like)
BF9343_0797	193	Yes	NA	NF	5	5.97e-97	IM	LemA	Unknown (LemA-like)
BF9343_0952	712	No	NA	NA	8	2.94e-150	IM	SurA_N_2, Rotamase_3, Rotamase_2	Peptidyl-prolyl-cis-trans isomerase (SurA-like)
BF9343_2659	605	Yes	NA	NF	6	2.39e-49	IM	PRK05771	V-type ATP synthase subunit I
BF9343_4169	559	No	NA	Yes/No	57	0	Lipoprotein	TPR, TPR_16	Unknown, plasminogen binding
BF9343_3471	623	Yes	16.7	Yes/Yes	43	0	Lipoprotein	Xylanase superfamily, Lipocalin_6 super family	Unknown	40.8936	3.71097	2.32242	0.258047	4.00903	417.13
BF9343_1606	358	No	NA	Yes/No	26	0	Lipoprotein	DUF3869	Unknown, possible adhesin
BF9343_1961	631	No	NA	Yes/No	24	0	Lipoprotein	None	Unknown
BF9343_4107	1002	No	NA	Yes/No	20	5.92e-279	Lipoprotein	TPR, CYPOR_like_FNR, tol_pal_ybgF, TPR_12, OM_YfiO	Unknown
BF9343_1285	1864	No	NA	Yes/No	19	4.03e-223	Lipoprotein	A2M_like, A2M_N, A2M superfamily, A2M_N_2	Unknown, alpha-2-macroglobulin like
BF9343_2546	702	No	NA	Yes/No	16	1.57e-127	Lipoprotein	Peptidase_S9, PD40, DAP2	Aminopeptidase
BF9343_2981	404	Yes	X	Yes/Yes	16	0	Lipoprotein	None	Unknown
BF9343_0883	496	No	NA	Yes/No	15	1.59e-272	Lipoprotein	DUF4270	Unknown
BF9343_0559	285	No	NA	Yes/No	14	1.6e-167	Lipoprotein	SMC_prok_B	Unknown
BF9343_3058	532	No	NA	Yes/Yes*	12	0	Lipoprotein	SusE	SusE homologue
BF9343_0902	517	No	NA	NF	12	5.58e-110	Lipoprotein	None	Unknown
BF9343_1125	263	No	NA	Yes/No	12	2.12e-249	Lipoprotein	META	Unknown
BF9343_3858	338	No	NA	NF	11	4.8e-152	Lipoprotein	HlyD_3, Biotin_lipoyl_2, RND_mfp	Unknown, possible role in efflux
BF9343_3340	536	Yes	X	NF	11	1.85e-146	Lipoprotein	Xylanase superfamily	Putative xylanase
BF9343_4228	406	Yes	7.3	Yes/No*	11	2.96e-212	Lipoprotein	DUF4374	Unknown	37.8216	3.63288	1.17981	0.589907	11.6239	123.063
BF9343_3699	820	No	NA	Yes/No	11	2.88e-123	Lipoprotein	Calx-beta superfamily	AapE
BF9343_2621	283	Yes	66	Yes/Yes	10	9.28e-161	Lipoprotein	Lipocalin_6	Unknown	43.45	3.77161	0.359909	0.179955	30.3168	62.2725
BF9343_1297	334	Yes	X	No/Yes	10	5.02e-68	Lipoprotein	None	Unknown
BF9343_1296	337	Yes	X	Yes/Yes	10	1.02e-216	Lipoprotein	PQQ_ADH_I	Unknown
BF9343_1504	455	Yes	X	Yes/Yes	10	9.79e-133	Lipoprotein	None	Unknown
BF9343_0433	452	No	NA	Yes/No	9	7.81e-86	Lipoprotein	None	Unknown
BF9343_0490	262	No	NA	No/No	9	2.35e-65	Lipoprotein	5_nucleotid_C	5'-nucleotidase
BF9343_0954	348	Yes	X	NF	9	2.62e-96	Lipoprotein	None	Unknown
BF9343_3819	783	No	NA	NF	9	2.09e-51	Lipoprotein	Bac_surface_Ag	Unknown
BF9343_2074	472	Yes	X	Yes/Yes	9	1.67e-99	Lipoprotein	None	Unknown
BF9343_0999	892	No	NA	Yes/No	8	5.37e-195	Lipoprotein	Transglut_core, COG1305	Transglutaminase-like
BF9343_2654	367	No	NA	Yes/No	8	7.21e-109	Lipoprotein	TlpA_like_family, DUF4369	Thioredoxin-like
BF9343_1250	337	No	NA	Yes/Yes*	8	3.45e-72	Lipoprotein	DUF1735, FA58C superfamily	Unknown
BF9343_2956	267	Yes	6	Yes/No*	8	2.38e-184	Lipoprotein	NigD	Unknown (NigD-like)	7.48768	2.01326	2.2803	0.760099	0.765645	73.2264
BF9343_26717	393	No	NA	NF	8	2.8069e-228	Lipoprotein	Peptidase_C11 superfamily	Peptidase
BF9343_0985	214	Yes	X	Yes/Yes	7	6.3e-82	Lipoprotein	HmuY	HmuY-like
BF9343_1249	380	Yes	22	Yes/No*	7	8.92e-129	Lipoprotein	Laminin_G_3, DUF1735	Unknown	17.8614	2.88264	1.72107	0.573689	3.19497	99.8541
BF9343_3014	666	No	NA	NF	7	1.37e-56	Lipoprotein	AmyAc_Pullulanase_LD-like, E_set_Pullulanase, DUF3372	Pullulanase
BF9343_1589	165	No	NA	No/No	7	3.48e-89	Lipoprotein	SPOR superfamily	Unknown
BF9343_3698	829	Yes	X	No/Yes	7	1.51e-87	Lipoprotein	BACON, Mfa2 superfamily	AapF
BF9343_3469	365	No	NA	Yes/No	7	1.12e-92	Lipoprotein	Xylanase	Putative xylanase
BF9343_3356	400	Yes	X	Yes/Yes	7	5.28e-44	Lipoprotein	None	Unknown
BF9343_0153	463	No	NA	No/No	6	3.84e-195	Lipoprotein	outer_NodT	Putative MFP
BF9343_2859	458	No	NA	Yes/No	6	3.04e-76	Lipoprotein	outer_NodT	Putative MFP
BF9343_3334	118	Yes	52	Yes/No*	6	4.01e-85	Lipoprotein	None	Unknown	105.021	4.65416	2.89203	0.964011	5.82482	1893.53
BF9343_1802	385	No	NA	NF	6	8.87e-74	Lipoprotein	None	Unknown
BF9343_1896	425	No	NA	NF	6	1.09e-73	Lipoprotein	Peptidase_S41_CPP_like, PDZ_signaling,	Peptidase
BF9343_4195	287	No	NA	NF	6	9.37e-224	Lipoprotein	FKBP_C, FKBP_N, FkpA	Putative FKBP-type peptidyl-prolyl cis-trans isomerase
BF9343_3570	214	No	NA	Yes/No	6	9.49e-85	Lipoprotein	None	Unknown
BF9343_0914	814	No	NA	NF	6	5.4e-61	Lipoprotein	GH20_chitobiase-like, Fn3_assoc, Glyco_hydro_20	Beta-N-acetylhexosaminidase
BF9343_0498	210	No	NA	Yes/No	5	1.72e-164	Lipoprotein	DUF4136	Unknown
BF9343_4033	334	No	NA	Yes/No	5	8.45e-75	Lipoprotein	M28_like_6, Peptidase_M28	Peptidase
BF9343_2882	306	No	NA	NF	5	1.36e-21	Lipoprotein	OMP_b-brl_2, Cna_B_2	Unknown, predicted b-barrel
BF9343_3033	130	Yes	X	Yes/No*	5	4.84e-30	Lipoprotein	None	Unknown
BF9343_3064	353	No	NA	NF	5	1.33e-106	Lipoprotein	HlyD_3, Biotin_lipoyl_2, RND_mfp	Putative RND family efflux transporter, MFP subunit
BF9343_3418	419	Yes	X	NF	5	3.3e-114	Lipoprotein	biotinyl_domain, 8a0102	Putative metal resistance related protein
BF9343_3697	552	No	NA	No/No	5	1.24e-41	Lipoprotein	Mfa2	AapG
BF9343_1892	363	No	NA	NF	5	4.86e-66	Lipoprotein	None	Unknown
BF9343_1729	774	No	NA	Yes/No	5	1.05e-52	Lipoprotein	GH20_chitobiase-like, Fn3_assoc, F5_F8_type_C, Glyco_hydro_20	Beta-N-acetylhexosaminidase
BF9343_14668	463	Yes	X	NF	5	4.5445e-75	Lipoprotein	None	Unknown
BF9343_1310	198	Yes	17.4	Yes/No*	5	5.73e-49	Lipoprotein	TlpA_like_family	Putative protein disulfide isomerase	198.648	5.29154	1.13663	0.568316	63.7459	619.038
BF9343_0148	186	No	NA	NF	4	1.17e-29	Lipoprotein	None	Unknown
BF9343_2291	770	No	NA	NF	4	2.22e-19	Lipoprotein	Bac_surface_Ag	Unknown
BF9343_3702	303	No	NA	Yes/No	4	2.66e-36	Lipoprotein	Mfa2	AapB
BF9343_1505	680	Yes	X	Yes/Yes	4	3.77e-45	Lipoprotein	PQQ_ABC_repeats	Unknown
BF9343_2979	194	No	NA	Yes/No	4	8.84e-80	Lipoprotein	None	Unknown
BF9343_1559	485	Yes	X	NF	4	1.12e-14	Lipoprotein	Peptidase_C10 superfamily	Putative peptidase
BF9343_1605	408	Yes	5.7	NF	4	4.57e-45	Lipoprotein	DUF940	Unknown	51.796	3.94731	0.0481259	0.024063	49.3623	54.3497
BF9343_3115	626	No	NA	NF	4	7.51e-91	Lipoprotein	Alpha_L_fucos superfamily, F5_F8_type_C (2), COG3669	Alpha-L-fucosidase
pBF9343.35c	213	Yes	X	Yes/No*	4	0.00015755	Lipoprotein	OmpA_C-like, OmpA	Unknown
BF9343_3091	622	Yes	X	Yes/No*	4	3.19e-17	Lipoprotein	GH32_B_Fructosidase, Glyco_hydro_32C, Glyco_32	Levanase
BF9343_1425	636	Yes	X	NF	4	1.16e-49	Lipoprotein	DUF3988	Unknown
BF9343_0155	384	No	NA	NF	6	4.79e-66	Lipoprotein	lipoyl_domain, HlyD_3, RND_mfp	Putative RND family efflux transporter, MFP subunit
BF9343_0200	259	NF	NA	NF	4	6.03e-23	Lipoprotein	DUF4098, DUF2807	Unknown
BF9343_2076	215	NF	NA	Yes/Yes	4	2.73e-89	Lipoprotein	None	Unknown
BF9343_2558	267	NF	NA	No/No	4	1.45e-36	Lipoprotein	ComL	BamD
BF9343_2991	198	NF	NA	Yes/Yes	4	5.8e-64	Lipoprotein	OmpH	OmpH-like
BF9343_3703	417	NF	NA	No/No	5	2.83e-49	Lipoprotein	Mfa2	AapA
BF9343_4119	1507	NF	NA	NF	7	2.7471e-123	Lipoprotein	None	Unknown
BF9343_4122	357	NF	NA	NF	6	1.8e-69	Lipoprotein	None	Unknown
BF9343_4120	1043	NF	NA	NF	6	6.6e-16	Lipoprotein	MM_CoA_mutase superfamily	Unknown
BF9343_1624	520	No	NA	NF	8	3.09e-75	Lipoprotein	LRR_5	Possible surface antigen
BF9343_12959	384	Yes	X	Yes/Yes	7	3.2047e-107	Lipoprotein	None	Unknown
BF9343_317110	328	Yes	X	Yes/Yes	8	1.3088e-80	Lipoprotein	None	Unknown
pBF9343.20c11	147	NF	NA	Yes/Yes	4	1.6944e-126	Lipoprotein	None	Unknown
BF9343_1941	459	No	NA	Yes/No	55	0	Non-classical secretion	DUF877	TssC
BF9343_3333	491	Yes	X	Yes/Yes	8	4.1e-195	Non-classical secretion	None	Unknown
BF9343_2975	342	No	NA	NF	7	9.1e-61	Non-classical secretion	None	Unknown
BF9343_3784	456	Yes	X	NF	5	6.67e-125	Other (+SP)	Rotamase, PRK10770	SurA
BF9343_1513	500	No	NA	Yes/No	15	1.75e-104	Other (+SP)	Caps_assemb_Wzi	Wzi homolog
BF9343_1626	849	No	NA	Yes/No	11	6.7e-96	Other (+SP)	Poly_export, SLBB, pepcterm_export, Wza	Capsular polysaccharide export, Wza
BF9343_3437	273	No	NA	Yes/No	10	1.26e-138	Other (+SP)	TolQ	Putative biopolymer transport protein
pBF9343.38c	279	No	NA	No/No	10	0.00017295	Other (+SP)	DUF4138, Bac_Flav_CT_N	TraN
BF9343_3700	616	No	NA	Yes/No	4	1.58e-59	Other (+SP)	OmpA_C-like, TPR, OmpA, TPR_11	AapD
BF9343_0679	1926	NF	NA	NF	10	3.02e-46	Other (+SP)	A2M, A2M_like, A2M_N	Alpha-2-macroglobulin-like
BF9343_1356	299	NF	NA	NF	4	3.16e-37	Other (+SP)	LysM, Glucosaminidase	Hemagglutinin
BF9343_2182	694	No	NA	No/No	14	8.47e-120	SusD homolog	SusD	SusD homolog
BF9343_2109	443	Yes	21	Yes/No*	13	2.21e-126	SusD homolog	SusD	SusD homolog	37.8174	3.63277	0.540448	0.180149	22.0281	64.924
BF9343_1247	514	No	NA	Yes/No	12	1.04e-192	SusD homolog	SusD, SusD-like_2	SusD homolog
BF9343_3059	539	No	NA	Yes/No	12	3.61e-111	SusD homolog	SusD	SusD homolog
BF9343_3355	482	Yes	X	Yes/Yes	11	1.05e-139	SusD homolog	SusD	SusD homolog
BF9343_1723	671	No	NA	NF	10	4.5e-142	SusD homolog	SusD	SusD homolog
BF9343_4139	625	Yes	16	Yes/Yes	10	1.59e-163	SusD homolog	SusD	SusD homolog	19.7196	2.98161	1.41758	0.472525	4.77808	81.3848
BF9343_0825	545	No	NA	NF	10	1.4e-74	SusD homolog	SusD	SusD homolog
BF9343_0570	464	No	NA	Yes/No	9	6.27e-136	SusD homolog	SusD	SusD homolog
BF9343_1720	538	Yes	X	NF	9	1.85e-157	SusD homolog	SusD	SusD homolog
BF9343_3172	539	Yes	X	NF	8	1.17e-107	SusD homolog	SusD	SusD homolog
BF9343_1539	503	No	NA	Yes/No	8	0.011928	SusD homolog	SusD	SusD homolog
BF9343_0564	500	No	NA	No/No	8	3.28e-224	SusD homolog	SusD	SusD homolog
BF9343_0562	531	No	NA	Yes/No	8	2.43e-221	SusD homolog	SusD	SusD homolog
BF9343_0829	588	Yes	X	Yes/Yes	7	1.55e-32	SusD homolog	SusD	SusD homolog
BF9343_0834	594	Yes	10.8	No/No*	7	9.21e-71	SusD homolog	SusD	SusD homolog	28.6279	3.35438	2.3303	0.776768	2.78453	294.325
BF9343_4137	666	No	NA	NF	7	5.82e-60	SusD homolog	SusD	SusD homolog
BF9343_3114	563	No	NA	NF	7	1.1e-47	SusD homolog	SusD	SusD homolog
BF9343_0341	495	No	NA	NF	5	1.11e-44	SusD homolog	SusD, SusD-like_3	SusD homolog
BF9343_2855	636	Yes	X	NF	5	9.26e-48	SusD homolog	SusD	SusD homolog
BF9343_0285	628	No	NA	NF	5	1.05e-89	SusD homolog	SusD (2)	SusD homolog
BF9343_0370	565	Yes	X	NF	4	1.26e-33	SusD homolog	SusD	SusD homolog
BF9343_1874	629	No	NA	Yes/No	15	0	SusD homolog	SusD, SusD-like	SusD homolog
BF9343_0568	504	No	NA	Yes/No	21	4.73e-230	SusD homolog	SusD	SusD homolog
BF9343_4147	675	No	NA	No/No	21	0	SusD homolog	SusD	SusD homolog
BF9343_0332	506	No	NA	Yes/No	19	0	SusD homolog	SusD	SusD homolog
BF9343_1638	516	No	NA	Yes/No	15	5.52e-216	SusD homolog	SusD	SusD homolog
BF9343_1873	1125	No	NA	Yes/No	74	0	TBDT	Cna_B_2, Plug, ligand_gated_channel, OMP_RagA_SusC	TBDT
BF9343_0527	795	No	NA	Yes/No	65	0	TBDT	ligand_ gated_channel, CirA	TBDT
BF9343_2108	1101	No	NA	Yes/No	52	0	TBDT	Cna_B_2, Plug, ligand_gated_channel, OMP_RagA_SusC	TBDT
BF9343_0563	>993	No	NA	No/No	48	0	TBDT	Plug, ligand_gated_channel, DUF4480 OMP_RagA_SusC	TBDT
BF9343_4229	805	No	NA	Yes/No	44	0	TBDT	ligand_ gated_channel, Cna_B_2, CirA	TBDT
BF9343_0018	804	No	NA	No/No	39	0	TBDT	ligand_ gated_channel, Cna_B_2, TonB-siderophor	TBDT
BF9343_1960	929	No	NA	No/No	36	0	TBDT	ligand_ gated_channel, Cna_B_2, CirA	TBDT
BF9343_4146	1086	No	NA	Yes/No	35	0	TBDT	Cna_B_2, Plug, OMP_RagA_SusC	TBDT
BF9343_3060	1002	No	NA	Yes/No	34	0	TBDT	Plug, Cna_B_2, ligand_gated_channel, OMP_RagA_SusC	TBDT
BF9343_1246	1101	No	NA	Yes/No	30	0	TBDT	Cna_B_2, ligand_gated_channel, Plug, STN, OMP_RagA_SusC	TBDT
BF9343_0569	>979	No	NA	Yes/No	28	0	TBDT	Plug, ligand_gated_channel, DUF4480 OMP_RagA_SusC	TBDT
BF9343_2612	767	No	NA	Yes/No	28	5.91e-303	TBDT	ligand_ gated_channel, Cna_B_2, FepA	TBDT
BF9343_1538	1042	No	NA	No/No	27	0	TBDT	Plug, Cna_B_2, ligand_gated_channel, OMP_RagA_SusC	TBDT
BF9343_1637	1089	No	NA	Yes/No	27	0	TBDT	Cna_B_2, Plug, ligand_gated_channel, OMP_RagA_SusC	TBDT
BF9343_0333	1016	No	NA	Yes/No	27	0	TBDT	Cna_B_2, Plug, ligand_gated_channel, OMP_RagA_SusC	TBDT
BF9343_2458	690	No	NA	Yes/No	24	1.24e-266	TBDT	ligand_ gated_channel, FepA	TBDT
BF9343_3354	1016	Yes	27.7	Yes/No*	24	1.57e-243	TBDT	Cna_B_2, Plug, igand_gated_channel, OMP_RagA_SusC	TBDT	6.09864	1.80807	2.83171	0.707927	0.359285	103.521
BF9343_0986	687	No	NA	Yes/No	22	0	TBDT	ligand_ gated_channel, BtuB	TBDT
BF9343_0833	1114	No	NA	Yes/No	22	0	TBDT	Plug, Cna_B_2, STN, TonB_dep_Rec, OMP_RagA_SusC	TBDT
BF9343_2460	784	No	NA	Yes/No	21	3.12e-147	TBDT	ligand_ gated_channel, TonB-siderophor	TBDT
BF9343_4138	1032	No	NA	Yes/Yes*	21	8.37e-298	TBDT	Cna_B_2, Plug, OMP_RagA_SusC	TBDT
BF9343_2077	785	No	NA	Yes/Yes*	21	4.37e-274	TBDT	ligand_ gated_channel, Cna_B_2, FepA	TBDT
BF9343_1794	763	No	NA	Yes/No	21	1.62e-219	TBDT	ligand_ gated_channel, Cna_B_2, FepA	TBDT
BF9343_0647	1138	No	NA	Yes/No	20	0	TBDT	Cna_B_2, Plug, ligand_gated_channel, STN, OMP_RagA_SusC	TBDT
BF9343_3092	783	No	NA	No/No	20	4.44e-300	TBDT	ligand_ gated_channel, CirA	TBDT
BF9343_1909	1125	Yes	X	NF	20	7.46e-216	TBDT	DUF4480, OMP_RagA_SusC, ligand_gated_channel	TBDT
BF9343_1721	1089	No	NA	Yes/No	20	2.63e-174	TBDT	DUF4480, Plug, ligand_gated_channel, OMP_RagA_SusC	TBDT
BF9343_0567	1011	No	NA	Yes/No	19	0	TBDT	Cna_B_2, Plug, ligand_gated_channel, OMP_RagA_SusC	TBDT
BF9343_2982	912	No	NA	Yes/No	18	2.24e-142	TBDT	Cna_B_2, Plug, CirA	TBDT
BF9343_2183	1089	Yes	13.7	NF	14	4.09e-164	TBDT	Cna_B_2, Plug, OMP_RagA_SusC	TBDT	5.57927	1.71906	1.33358	0.666788	1.47032	21.171
BF9343_4108	567	No	NA	Yes/No	14	3.05e-287	TBDT	None	TBDT
BF9343_0830	1103	No	NA	Yes/Yes*	14	1.87e-157	TBDT	DUF4480, STN, ligand_gated_channel, OMP_RagA_SusC	TBDT
BF9343_1903	689	No	NA	Yes/No	14	4.36e-145	TBDT	ligand_ gated_channel, TonB-siderophor	TBDT
BF9343_0284	1067	No	NA	NF	14	4.1e-119	TBDT	Cna_B_2, Plug, OMP_RagA_SusC	TBDT
BF9343_1271	802	No	NA	Yes/No	13	5.13e-126	TBDT	ligand_ gated_channel, Cna_B_2, CirA	TBDT
BF9343_3173	1059	Yes	7.3	NF	13	9.52e-161	TBDT	Cna_B_2, Plug, ligand_gated_channel, OMP_RagA_SusC	TBDT	1.35559	0.304234	0.0859847	0.0429924	1.2439	1.4773
BF9343_4136	1071	No	NA	NF	12	2.27e-298	TBDT	Plug, Cna_B_2, OMP_RagA_SusC	TBDT
BF9343_1722	1056	Yes	9.8	NF	11	2.15e-193	TBDT	Plug, Cna_B_2, OMP_RagA_SusC	TBDT	17.2828	2.84971	1.92873	0.385747	2.51175	118.919
BF9343_4209	1066	No	NA	NF	10	1.82e-151	TBDT	Cna_B_2, Plug, TonB_dep_Rec, OMP_RagA_SusC	TBDT
BF9343_0318	858	No	NA	Yes/No	9	4.78e-173	TBDT	ligand_ gated_channel, Cna_B_2, CirA	TBDT
BF9343_0828	1136	Yes	X	NF	9	2.21e-140	TBDT	Cna_B_2, Plug, STN, TonB_dep_Rec, OMP_RagA_SusC	TBDT
BF9343_1640	1107	Yes	X	NF	9	5.1e-136	TBDT	Cna_B_2, Plug, ligand_gated_channel, OMP_RagA_SusC	TBDT
BF9343_3113	1051	No	NA	NF	9	2.64e-247	TBDT	Cna_B_2, Plug, TonB_dep_Rec, OMP_RagA_SusC	TBDT
BF9343_0371	1111	Yes	12.5	NF	8	1.03e-49	TBDT	Plug, Cna_B_2, TonB_dep_Rec, OMP_RagA_SusC	TBDT	10.8531	2.38445	0.726448	0.363224	5.24883	22.4413
BF9343_0640	970	Yes	X	NF	8	2.5e-157	TBDT	CarboxypepD_reg, ligand_gated_channel	TBDT
BF9343_1506	678	No	NA	Yes/No	8	6.76e-86	TBDT	ligand_ gated_channel, BtuB	TBDT, BtuB
BF9343_0826	1015	Yes	X	NF	8	5.72e-155	TBDT	Cna_B_2, Plug super family, TonB_dep_Rec, OMP_RagA_SusC	TBDT
BF9343_0565	>952	No	NA	Yes/No	8	8.61e-122	TBDT	Plug, TonB_dep_Rec,Cna_B_2, OMP_RagA_SusC	TBDT
BF9343_3949	1081	No	NA	NF	7	4.06e-78	TBDT	Cna_B_2, SusC_RagA_signal, ligand_gated_channel	TBDT
BF9343_2623	714	No	NA	Yes/No	7	5.65e-180	TBDT	ligand_ gated_channel, Cna_B_2, FepA	TBDT
BF9343_3543	892	Yes	X	Yes/No*	7	1.41e-73	TBDT	ligand_gated_channel, Cna_B_2, STN, CirA	TBDT
BF9343_3955	998	No	NA	NF	7	4.37e-74	TBDT	Cna_B_2, ligand_gated_channel, OMP_RagA_SusC	TBDT
BF9343_0340	1019	No	NA	NF	7	6.87e-157	TBDT	Cna_B_2, TonB_dep_Rec, Plug, SusC_RagA_signal	TBDT
BF9343_0494	1063	Yes	X	NF	6	1.99e-53	TBDT	Cna_B_2, Plug, OMP_RagA_SusC	TBDT
BF9343_0724	1045	No	NA	Yes/Yes*	6	1.55e-65	TBDT	Cna_B_2, Plug, TonB_dep_Rec, OMP_RagA_SusC	TBDT
BF9343_2856	1125	Yes	X	NF	6	1.32e-89	TBDT	Cna_B_2, Plug, STN, ligand_gated_channel, OMP_RagA_SusC	TBDT
BF9343_1908	743	No	NA	Yes/No	5	4.15e-45	TBDT	ligand_ gated_channel, FecA	TBDT
BF9343_0627	1046	Yes	X	NF	4	5.72e-56	TBDT	Cna_B_2, Plug, TonB_dep_Rec, OMP_RagA_SusC	TBDT
BF9343_1716	1083	Yes	X	NF	4	0.023031	TBDT	Cna_B_2, Plug, ligand_gated_channel, OMP_RagA_SusC	TBDT
BF9343_0852	1089	Yes	X	NF	4	2.3e-76	TBDT	Cna_B_2, Plug, TonB_dep_Rec, OMP_RagA_SusC	TBDT
BF9343_3170	703	NF	NA	No/No	5	2.41e-09	TBDT	ligand_ gated_channel, TonB_hemin	TBDT
BF9343_1542	197	Yes	X	NF	4	1.3e-19	Unknown (+SP)	DUF3575	Unknown
BF9343_1541	482	No	NA	NF	13	0	Unknown (+SP)	TPR, DUF3868 super family, OmpA_C-like super family	Unknown
BF9343_3072	502	No	NA	Yes/No	13	5.46e-173	Unknown (+SP)	DUF187 super family	Unknown
BF9343_3043	304	No	NA	Yes/No	11	6.65e-67	Unknown (+SP)	LTD, oadG_fam	Unknown
BF9343_1864	855	No	NA	Yes/No	10	6.9e-139	Unknown (+SP)	Cna_B_2	Unknown
BF9343_1008	952	No	NA	NF	9	8.22e-75	Unknown (+SP)	Peptidase_MA_2	Unknown
BF9343_241312	403	Yes	X	NF	4	1.1279e-197	Unknown (+SP)	TPR, TPR_11	Unknown
1>: The annotated sequence is only a partial sequence
2NF: Protein was found in the initial analysis of the OM proteome, but not in the subsequent experiment in which the PK-sensitivity of OM proteins was assessed
3X: Protein was not detected after PK treatment; NA-not applicable (for PK-resistant proteins and proteins that lacked predicted signal peptides)
4Results of the experiment in which the PK sensitvity of proteins in intact cells and in a purified membrane fraction was compared. An asterisk indicates that the PK sensitivity of the protein in intact cells differed from the PK sensitivity observed in the experiments shown in column 4.
observed in the experiment shown in column 4. NF-Not found in this experiment
5+SP: protein predicted to contain a signal peptide
6The mean and standard deviation (SD) were calculated in cases where the fold difference -PK/+PK was a numerical value.
7Using the annotated translational start site BF9343_2671 is predicted to be a cytoplasmic protein, but if translation begins at an AUG 13 codons upstream then it is predicted to be a lipoprotein.
8Using the annotated translational start site BF9343_1466 is predicted to be a cytoplasmic protein, but if translation begins at an AUG 42 codons upstream it is predicted to be a lipoprotein. Curiously, the annotated start site encodes Lys
rather than Met.
9Using the annotated translational start site BF9343_1295 is predicted to be a cytoplasmic protein, but if translation begins at an AUG 15 codons downstream then it is predicted to be a lipoprotein.
10Using the annotated translational start site BF9343_3171 is predicted to be a cytoplasmic protein, but if translation begins at an AUG 10 codons upstream it is predicted to be a lipoprotein.
11Using the annotated translational start site pBF9343.20c is predicted to be a cytoplasmic protein, but if translation begins at an AUG 38 amino acids downstream then it is predicted to be a lipoprotein. The observation that no peptides
from the region between the annotated start site and the new start site were found supports this reassignmnet.
12Using the annotated translational start site BF9343_2413 is predicted to be a cytoplasmic protein, but if translation begins at an AUG 7 amino acids upstream it is predicted to be an OM protein. This reassignment is supported by evidence that the protein is located in the periplasm (20).
